# Supplementary material for: Honeycomb-like carbon with doping of a transition-metal and nitrogen for highly efficient zinc–air battery and zinc-ion battery
Source: Royal Society of Chemistry journal article supplement (doi:10.1039/d1se01427g), 2021-11-15
Supplement: d1se01427g1.pdf [file d1se01427g1.pdf]

## Electronic Supplementary Information (ESI)

# Honeycomb-Like Carbon with Doping of Transition-Metal and Nitrogen for Highly Efficient Zinc-Air Battery and Zinc-Ion Battery

Qian Huang,<sup>†a</sup> Shuxian Zhuang,<sup>†b</sup> Xin You,<sup>b</sup> Jinpeng Zhang,<sup>a</sup> Ao Xie,<sup>b</sup> Yu Chen,<sup>c</sup> Yang Tang,<sup>\*a</sup>

Yongmei Chen,<sup>b</sup> Mingfei Shao,<sup>d</sup> Xiao Jin Yang,<sup>b</sup> Pingyu Wan<sup>\*b</sup>

<sup>a</sup>Institute of Applied Electrochemistry, Beijing University of Chemical Technology, Beijing 100029, China.

Email: tangyang@mail.buct.edu.cn

<sup>b</sup>National Fundamental Research Laboratory of New Hazardous Chemicals Assessment & Accident Analysis, Beijing University of Chemical Technology, Beijing 100029, China.

Email: pywan@mail.buct.edu.cn

<sup>c</sup>Institute of Future Technology, Ningbo Ronbay New Energy Technology Co., Ltd, Ningbo 315000, China

<sup>d</sup>State Key Laboratory of Chemical Resource Engineering, Beijing University of Chemical Technology, Beijing 100029, China

<sup>†</sup>These co-first authors contributed equally to this work.

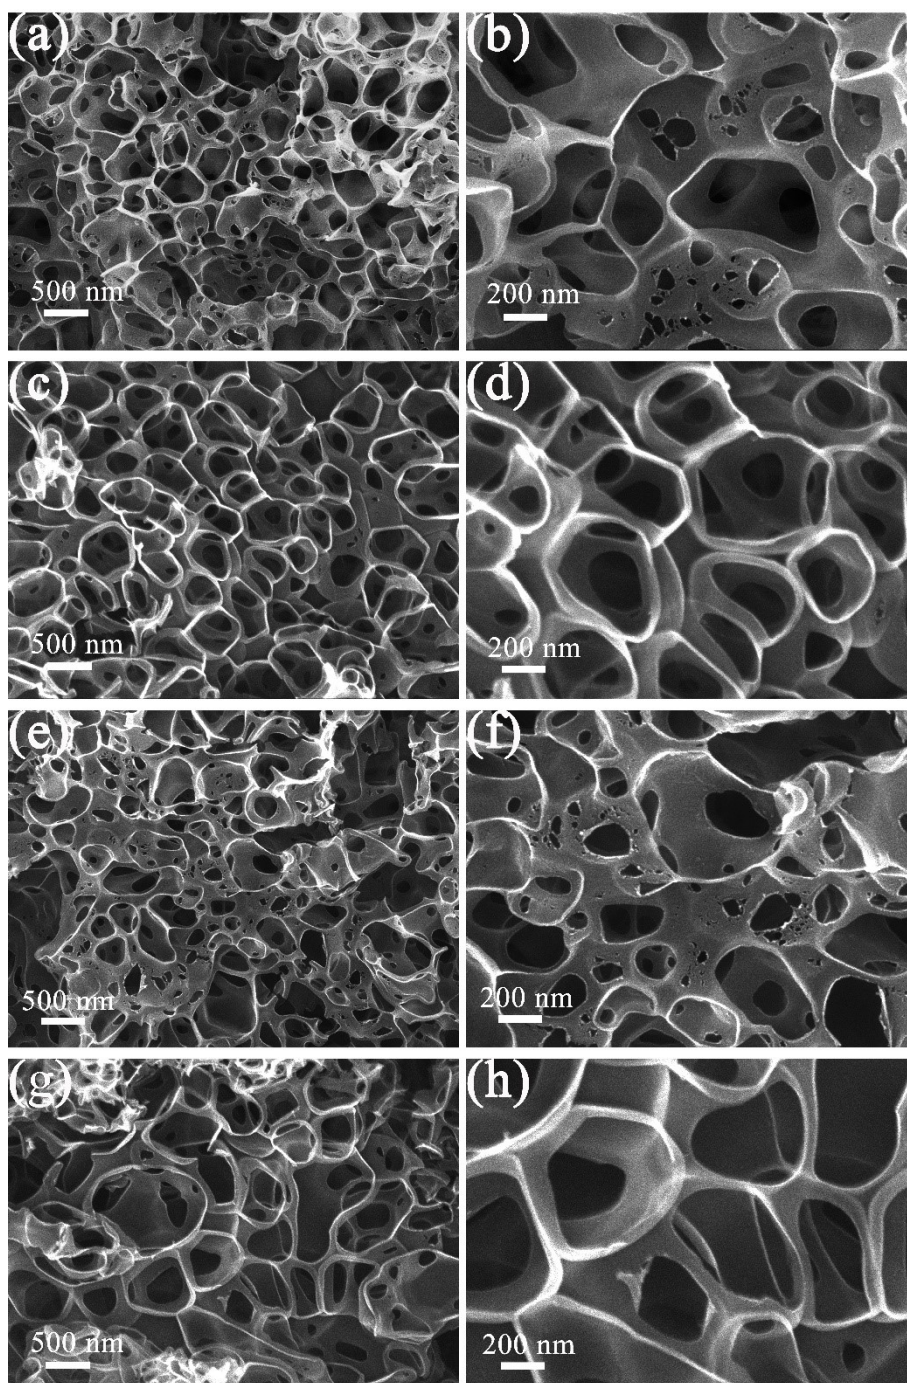

**Fig. S1** SEM images of (a, b) FeZnN-C; (c, d) FeN-C; (e, f) ZnN-C; (g, h) N-C catalysts.

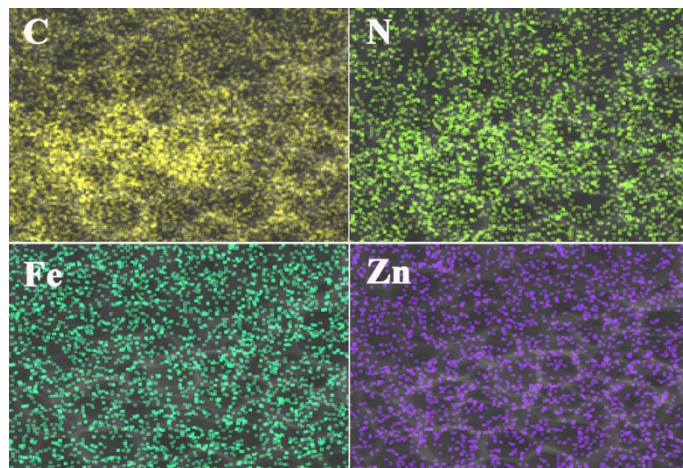

**Fig. S2** The EDX mapping images of FeZnN-C for C, N, Fe and Zn elements.

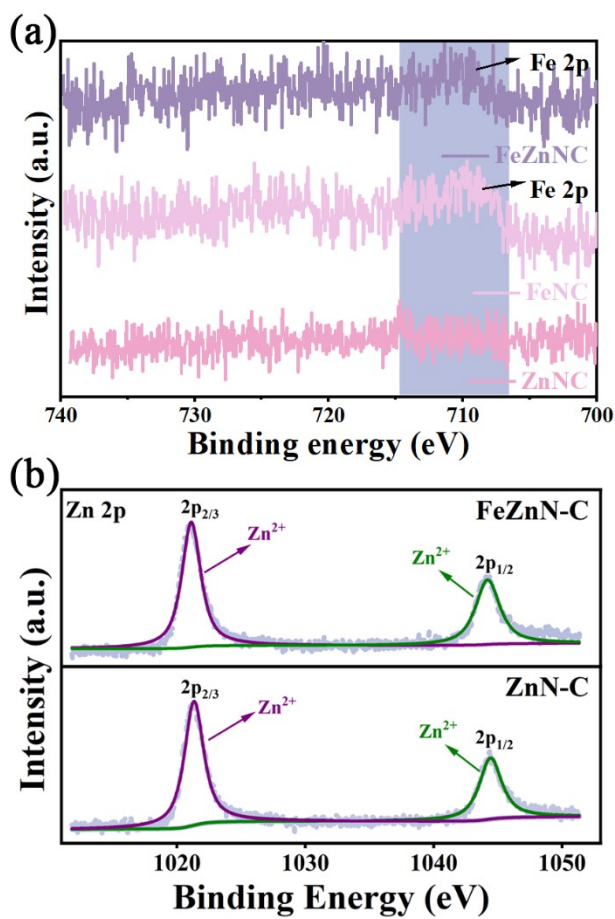

**Fig. S3** (a) Fe 2p spectrum of FeN-C, ZnN-C, FeZnN-C catalysts; (b) Zn 2p spectrum of FeZnN-C and ZnN-C catalysts.

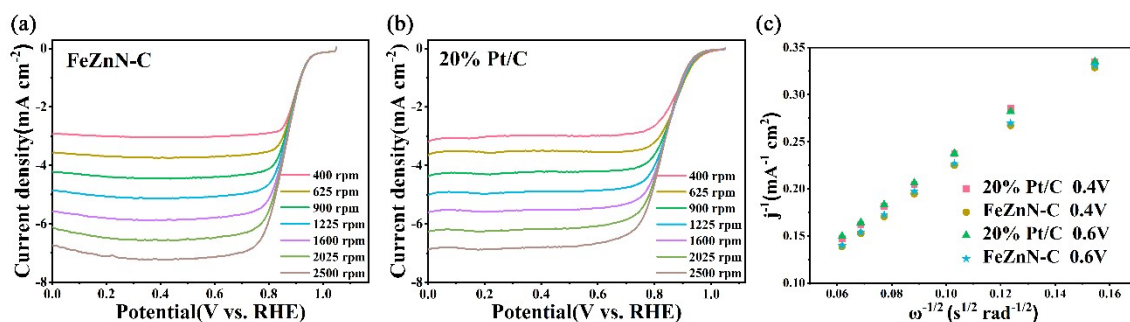

**Fig. S4** The LSV curves of (a) FeZnN-C and (b) 20% Pt/C at different rotation rates; (c) the corresponding Koutecky-Levich curves at 0.4 V and 0.6 V.

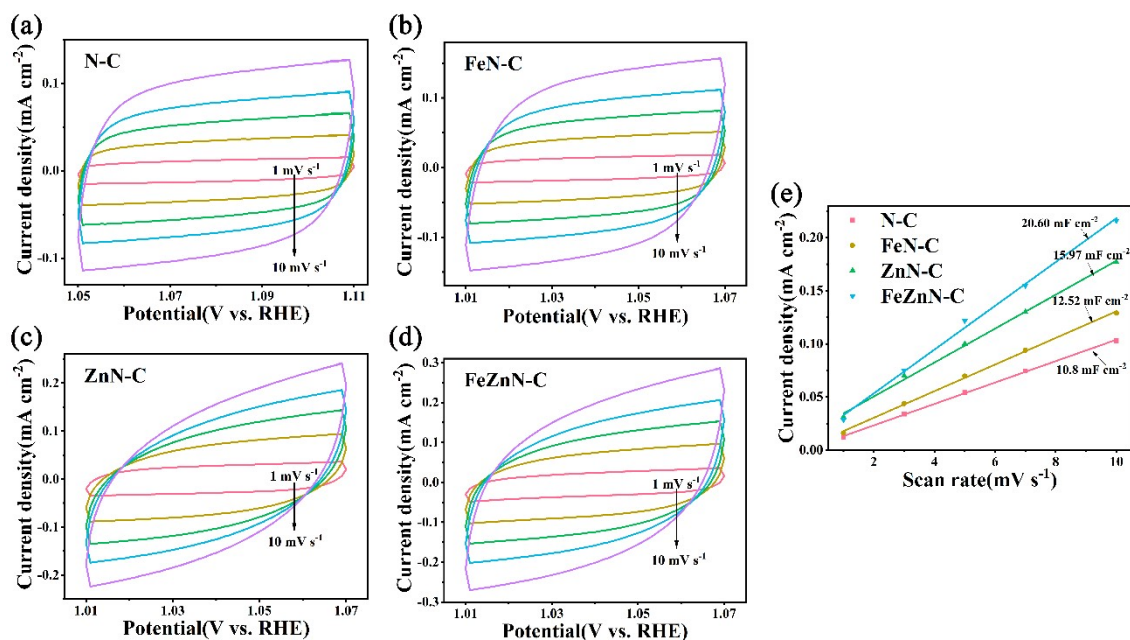

**Fig. S5** CV curves of (a) N-C, (b) FeN-C, (c) ZnN-C, (d) FeZnN-C at different scan rates in Ar-saturated 1 M KOH; (e) the corresponding  $C_{dl}$  values.



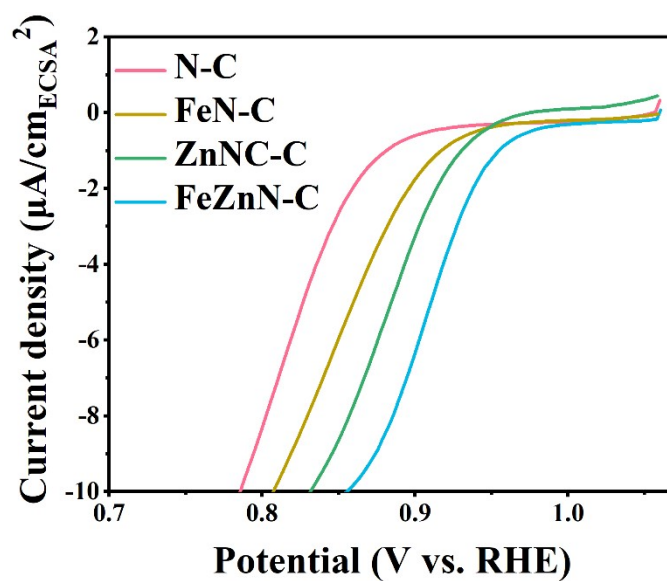

Fig. S6 The ECSA normalized LSV curves of N-C, FeN-C, ZnN-C and FeZnN-C.

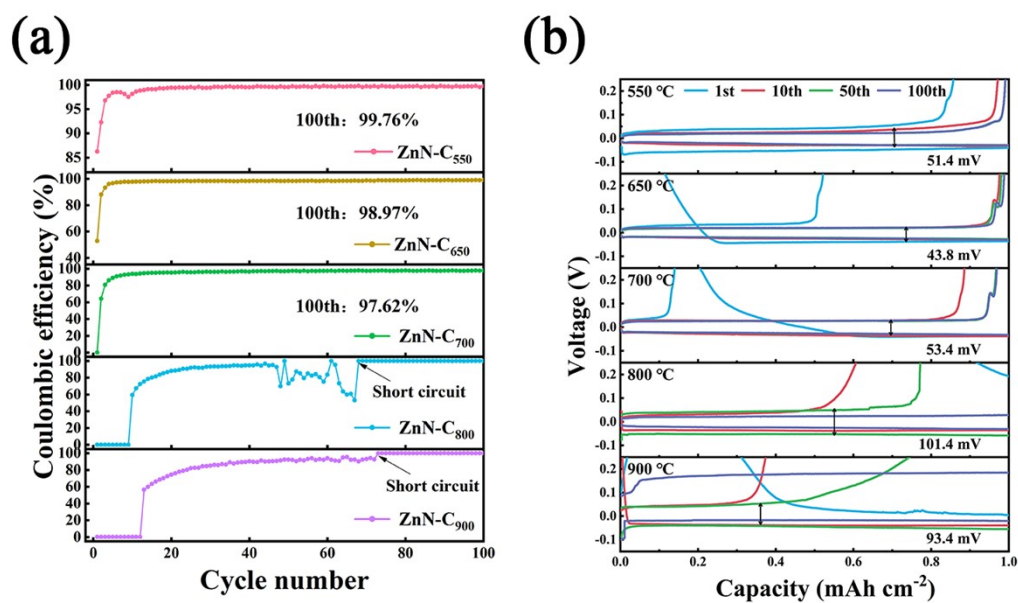

Fig. S7 (a) Coulombic efficiency of coin cell of  $\text{ZnN-C}_x \parallel \text{Zn}$  plate, (b) Polarization curves of the plating/stripping of  $\text{ZnN-C}_x$  at  $1 \text{ mA cm}^{-2} - 1 \text{ mAh cm}^{-2}$ .

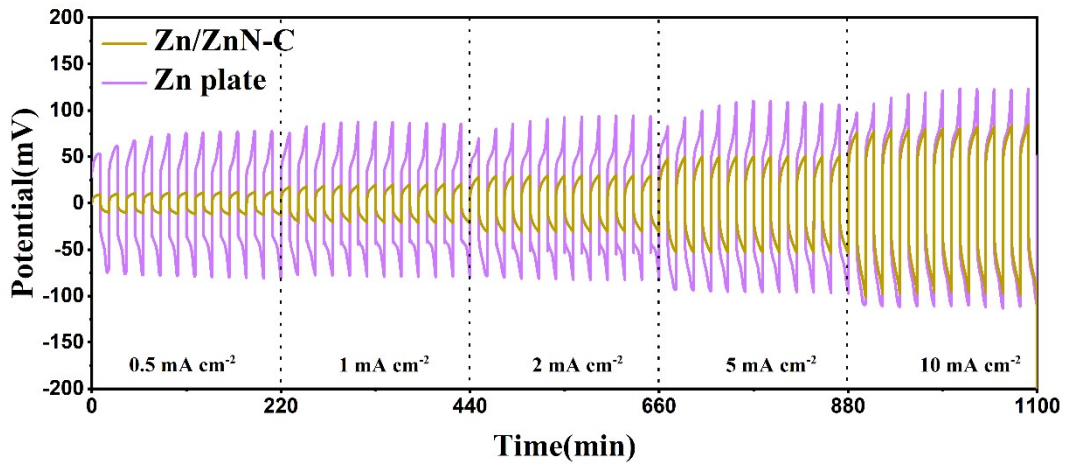

**Fig. S8** Rate performance of symmetric coin cells of Zn/ZnN-C || Zn/ZnN-C and Zn plate || Zn plate.

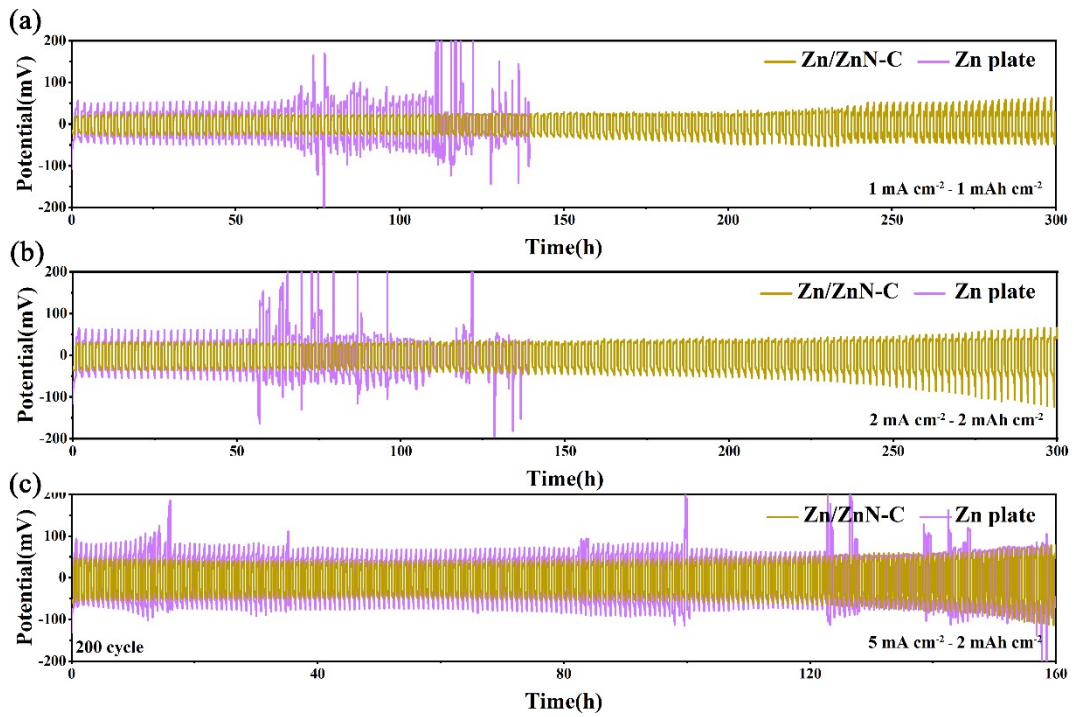

**Fig. S9** Electrochemical stability (Zn plating/stripping) tests of symmetric coin cells of Zn/ZnN-C || Zn/ZnN-C and Zn plate || Zn plate at different current densities - area capacities: (a)  $1 \text{ mA cm}^{-2}$  -  $1 \text{ mAh cm}^{-2}$ ; (b)  $2 \text{ mA cm}^{-2}$  -  $2 \text{ mAh cm}^{-2}$ ; (c)  $5 \text{ mA cm}^{-2}$  -  $2 \text{ mAh cm}^{-2}$ .

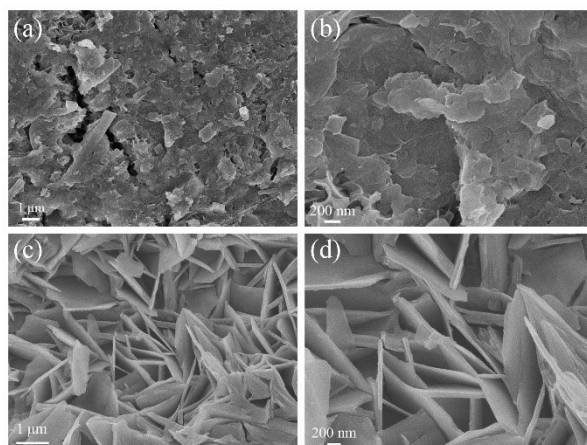

**Fig. S10** The SEM images of (a-b) Zn/ZnN-C and (c-d) commercial Zn plate after plating/stripping tests.

**Table S1.** Atomic percentage of different elements and various N species for N-C, FeN-C, ZnN-C, FeZnN-C catalysts.

| Atomic %           |                    | N-C   |       | FeN-C |       | ZnN-C |       | FeZnN-C |       |       |       |
|--------------------|--------------------|-------|-------|-------|-------|-------|-------|---------|-------|-------|-------|
| <b>C</b>           |                    | 86.82 |       | 85.40 |       | 85.05 |       | 84.17   |       |       |       |
| <b>N</b>           | <b>Pyridinic N</b> | 8.95  | 3.019 | 9.58  | 3.459 | 8.10  | 2.544 | 9.85    | 3.158 |       |       |
|                    | <b>Graphitic N</b> |       | 3.036 |       |       |       |       |         | 3.303 | 2.701 | 3.367 |
|                    | <b>Metal N</b>     |       | 0     |       |       |       |       |         | 1.146 | 1.418 | 1.915 |
|                    | <b>Pyrrolic N</b>  |       | 2.227 |       |       |       |       |         | 1.259 | 0.890 | 0.924 |
|                    | <b>Oxidized N</b>  |       | 0.668 |       |       |       |       |         | 0.413 | 0.547 | 0.486 |
| <b>Effective N</b> |                    | 67.70 |       | 82.50 |       | 82.30 |       | 85.70   |       |       |       |
| <b>O</b>           |                    | 4.22  |       | 4.74  |       | 6.12  |       | 5.17    |       |       |       |
| <b>Fe</b>          |                    | 0     |       | 0.28  |       | 0     |       | 0.21    |       |       |       |
| <b>Zn</b>          |                    | 0     |       | 0     |       | 0.73  |       | 0.60    |       |       |       |

**Table S2.** The comparison of ORR activity of different catalysts in 0.1 M KOH.

| Catalysts              | $E_{\text{onset}}$<br>(V vs.RHE) | $E_{1/2}$<br>(V vs.RHE) | $j_L$<br>(mA cm <sup>-2</sup> ) | References       |
|------------------------|----------------------------------|-------------------------|---------------------------------|------------------|
| <b>FeZnN-C</b>         | <b>1.052</b>                     | <b>0.901</b>            | <b>-6.04</b>                    | <b>This work</b> |
| <b>ZnN-C</b>           | <b>1.039</b>                     | <b>0.856</b>            | <b>-5.72</b>                    | <b>This work</b> |
| <b>FeN-C</b>           | <b>0.959</b>                     | <b>0.810</b>            | <b>-5.16</b>                    | <b>This work</b> |
| <b>N-C</b>             | <b>0.925</b>                     | <b>0.789</b>            | <b>-4.51</b>                    | <b>This work</b> |
| FeNi@NCNT-CP           | 1.0                              | 0.85                    | -6.0                            | 1                |
| CoNi@N-DCNT            | 0.92                             | 0.83                    | -6.0                            | 2                |
| Fe/Co-N/P-9            | 0.96                             | 0.85                    | -4.5                            | 3                |
| SA-Fe-HPC              | /                                | 0.89                    | -5.4                            | 4                |
| NC-Co SA               | 1.00                             | 0.87                    | /                               | 5                |
| FeN-HPC <sub>GD2</sub> | 0.98                             | 0.888                   | -5.42                           | 6                |
| FeNC-1                 | /                                | 0.90                    | -6.0                            | 7                |
| Fe-Zn-SA/NC            | 0.94                             | 0.85                    | /                               | 8                |
| Fe/N-PCNs              | 0.96                             | 0.86                    | /                               | 9                |
| (Zn,Co)/NSC            | 1.07                             | 0.893                   | -5.4                            | 10               |



**Table S3.** The performance of Zn-air batteries of nonprecious catalysts in 6 M KOH.

| Catalysts                   | Peak power density<br>(mW cm <sup>-2</sup> ) | References       |
|-----------------------------|----------------------------------------------|------------------|
| <b>FeZnN-C</b>              | <b>257</b>                                   | <b>This work</b> |
| FeN-HPC <sub>GD2</sub>      | 241                                          | 6                |
| Ni <sub>3</sub> Fe/N-S-CNTs | 180                                          | 11               |
| Fe <sub>3</sub> Mn/N-C      | 160.8                                        | 12               |
| BTC-Co-O-Cu-BTA<br>MOF      | 200                                          | 13               |
| GNCNTs                      | 207                                          | 14               |
| CoN <sub>4</sub> /NG        | 115                                          | 15               |
| Zn/CoN-C                    | 230                                          | 16               |
| Mo-N/C@MoS <sub>2</sub>     | 196.4                                        | 17               |

**Table S4.** Discharge voltages at different current densities of Zinc-air batteries using FeZnN-C and 20% Pt/C as cathodic electrocatalysts.

| Current density (mA cm <sup>-2</sup> ) | Cell Voltage (V) |          |
|----------------------------------------|------------------|----------|
|                                        | FeZnN-C          | 20% Pt/C |
| <b>1</b>                               | 1.44             | 1.37     |
| <b>10</b>                              | 1.36             | 1.30     |
| <b>50</b>                              | 1.24             | 1.18     |
| <b>100</b>                             | 1.15             | 1.09     |

**Table S5.** The comparison of the battery performance based on different catalysts.

| Electrode                   | Electrolyte                                             | Current density<br>(mA cm <sup>-2</sup> ) | Lifetime<br>(h) | Voltage<br>hysteresis (mV) | References       |
|-----------------------------|---------------------------------------------------------|-------------------------------------------|-----------------|----------------------------|------------------|
| <b>Zn/ZnN-C</b>             | <b>2 M ZnSO<sub>4</sub></b>                             | <b>0.5</b>                                | <b>600</b>      | <b>21</b>                  | <b>This work</b> |
| CNT-Zn                      | 2 M ZnSO <sub>4</sub>                                   | 2                                         | 200             | 27                         | 18               |
| 3D Zn Anode                 | 2 M ZnSO <sub>4</sub>                                   | 0.5                                       | 350             | 40                         | 19               |
| CC@MnO <sub>2</sub> -UTF@Zn | 2 M ZnSO <sub>4</sub>                                   | 1                                         | 150             | 150                        | 20               |
| ZnSe@Zn                     | 2 M ZnSO <sub>4</sub>                                   | 1                                         | 1530            | 128                        | 21               |
| Cu foil@Zn                  | 2M ZnSO <sub>4</sub> + 0.1 M<br>MnSO <sub>4</sub>       | 2                                         | 140             | 40                         | 22               |
| S/MX@ZnS@Zn-300             | 2M ZnSO <sub>4</sub>                                    | 1                                         | 1100            | 75                         | 23               |
| Zn micromesh                | 3.0 M Zn(CF <sub>3</sub> SO <sub>3</sub> ) <sub>2</sub> | 1                                         | 500             | 50                         | 24               |

## Reference

1. X. Zheng, X. Cao, K. Zeng, J. Yan, Z. Sun, M. H. Rummeli and R. Yang, *Small*, 2021, **17**, 2006183.
2. C. Zhu, W. Yang, J. Di, S. Zeng, J. Qiao, X. Wang, B. Lv and Q. Li, *J Energy Chem*, 2021, **54**, 63-71.
3. J. Di, J. Guo, N. Wang and G. Ma, *ACS Sustain Chem Eng*, 2019, **7**, 7716-7727.
4. Z. Zhang, J. Sun, F. Wang and L. Dai, *Angew Chem Int Edit*, 2018, **57**, 9038-9043.
5. W. Zang, A. Sumboja, Y. Ma, H. Zhang, Y. Wu, S. Wu, H. Wu, Z. Liu, C. Guan, J. Wang and S. J. Pennycook, *ACS Catal*, 2018, **8**, 8961-8969.
6. Y. Chen, I. Kone, Y. Gong, A. Xie, H. Hu, D. Kong, J. Liu, Y. Tang, X. Yang, R. Pang and P. Wan, *Carbon*, 2019, **152**, 325-334.
7. W. Wang, M. Tang, Z. Zheng and S. Chen, *Adv Energy Mater*, 2019, **9**, 1803628.
8. J. Xu, S. Lai, D. Qi, M. Hu, X. Peng, Y. Liu, W. Liu, G. Hu, H. Xu, F. Li, C. Li, J. He, L. Zhuo, J. Sun, Y. Qiu, S. Zhang, J. Luo and X. Liu, *Nano Res*, 2021, **14**, 1374-1381.
9. L. Zheng, S. Yu, X. Lu, W. Fan, B. Chi, Y. Ye, X. Shi, J. Zeng, X. Li and S. Liao, *ACS Appl Energy Mater*, 2020, **12**, 13878-13887.
10. D. Liu, B. Wang, H. Li, S. Huang, M. Liu, J. Wang, Q. Wang, J. Zhang and Y. Zhao, *Nano Energy*, 2019, **58**, 277-283.
11. C. Lai, J. Wang, W. Lei, C. Xuan, W. Xiao, T. Zhao, T. Huang, L. Chen, Y. Zhu and D. Wang, *ACS Appl Energy Mater* 2018, **10**, 38093-38100.
12. G. Yang, J. Zhu, P. Yuan, Y. Hu, G. Qu, B.-A. Lu, X. Xue, H. Yin, W. Cheng, J. Cheng, W. Xu, J. Li, J. Hu, S. Mu and J.-N. Zhang, *Nat Comm*, 2021, **12**, 1734.
13. M. F. Sanad, A. R. Puente Santiago, S. A. Tolba, M. A. Ahsan, O. Fernandez-Delgado, M. Shawky Adly, E. M. Hashem, M. Mahrous Abodouh, M. S. El-Shall, S. T. Sreenivasan, N. K. Allam and L. Echegoyen, *J Am Chem Soc*, 2021, **143**, 4064-4073.
14. Y. Xu, P. Deng, G. Chen, J. Chen, Y. Yan, K. Qi, H. Liu and B. Y. Xia, *Adv Funct Mater*, 2020, **30**, 1906081.
15. L. Yang, L. Shi, D. Wang, Y. Lv and D. Cao, *Nano Energy*, 2018, **50**, 691-698.
16. Z. Lu, B. Wang, Y. Hu, W. Liu, Y. Zhao, R. Yang, Z. Li, J. Luo, B. Chi, Z. Jiang, M. Li, S. Mu, S. Liao, J. Zhang and X. Sun, *Angew Chem Int Edit*, 2019, **58**, 2622-2626.
17. I. S. Amiin, Z. Pu, X. Liu, K. A. Owusu, H. G. R. Monestel, F. O. Boakye, H. Zhang and S. Mu, *Adv Funct Mater*, 2017, **27**, 1702300.
18. Y. Zeng, X. Zhang, R. Qin, X. Liu, P. Fang, D. Zheng, Y. Tong and X. Lu, *Adv Mater*, 2019, **31**, e1903675.
19. Z. Kang, C. Wu, L. Dong, W. Liu, J. Mou, J. Zhang, Z. Chang, B. Jiang, G. Wang, F. Kang and C. Xu, *ACS Sustain Chem Engin*, 2019, **7**, 3364-3371.
20. Y. Chen, J. Li, S. Zhang, J. Cui and M. Shao, *Adv Mater Inters*, 2020, **7**, e2000510.
21. X. Yang, C. Li, Z. Sun, S. Yang, Z. Shi, R. Huang, B. Liu, S. Li, Y. Wu, M. Wang, Y. Su, S. Dou and J. Sun, *Adv Mater*, 2021, e2105951.
22. C. Li, X. Shi, S. Liang, X. Ma, M. Han, X. Wu and J. Zhou, *Chem Engin J*, 2020, **379**, 379.
23. Y. An, Y. Tian, C. Liu, S. Xiong, J. Feng and Y. Qian, *ACS Nano*, 2021, **15**, 15259-15273.
24. H. Liu, J. Li, X. Zhang, X. Liu, Y. Yan, F. Chen, G. Zhang and H. Duan, *Adv Funct Mater*, 2021.
